# Supplementary material for: PATZ1 is a new prognostic marker of glioblastoma associated with the stem-like phenotype and enriched in the proneural subtype
Source: PubMed Central journal article supplement (PMC5601732; doi:10.18632/oncotarget.19546), 2017-07-25
Supplement: oncotarget-08-59282-s001.pdf [file oncotarget-08-59282-s001.pdf]

# PATZ1 is a new prognostic marker of glioblastoma associated with the stem-like phenotype and enriched in the proneural subtype

## SUPPLEMENTARY MATERIALS

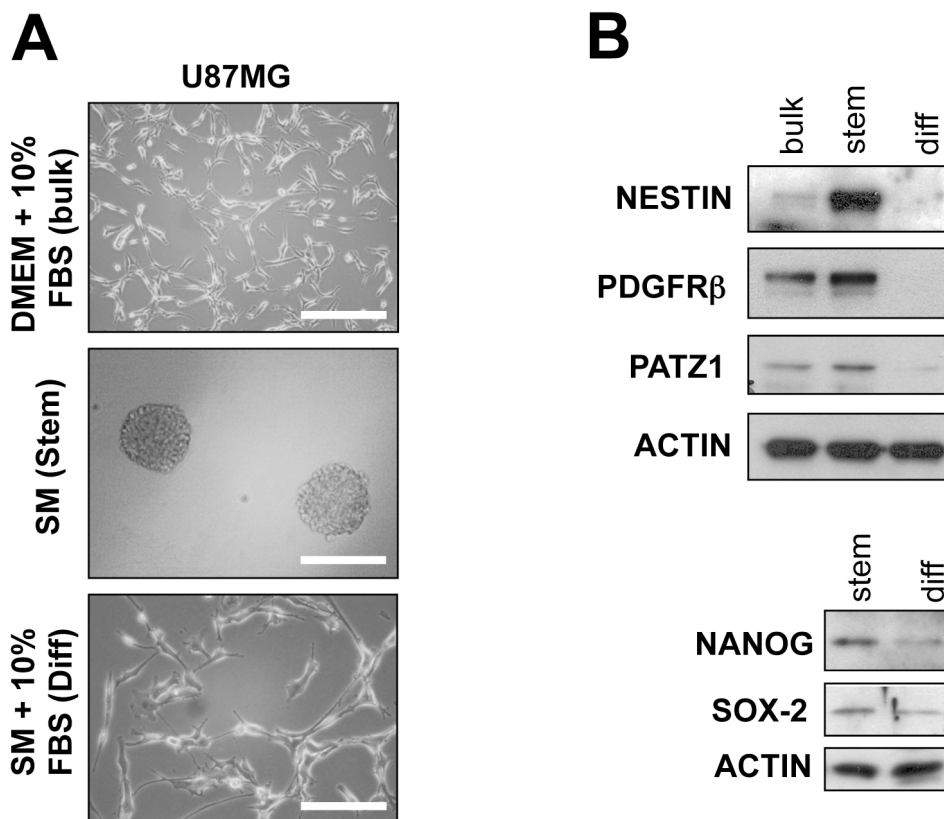

**Supplementary Figure 1:** (A) Representative microscope images of U87MG cells (bulk), isolated U87MG spheres grown in stem cell medium (SM) without (Stem) or with (Diff.) 10% FBS. Scale bar: 200  $\mu$ m (upper panel), 100  $\mu$ m (middle and lower panels). (B) Western bolt analysis of cells shown in A. Proteins detected are indicated on the side. Actin was evaluated as a loading control.

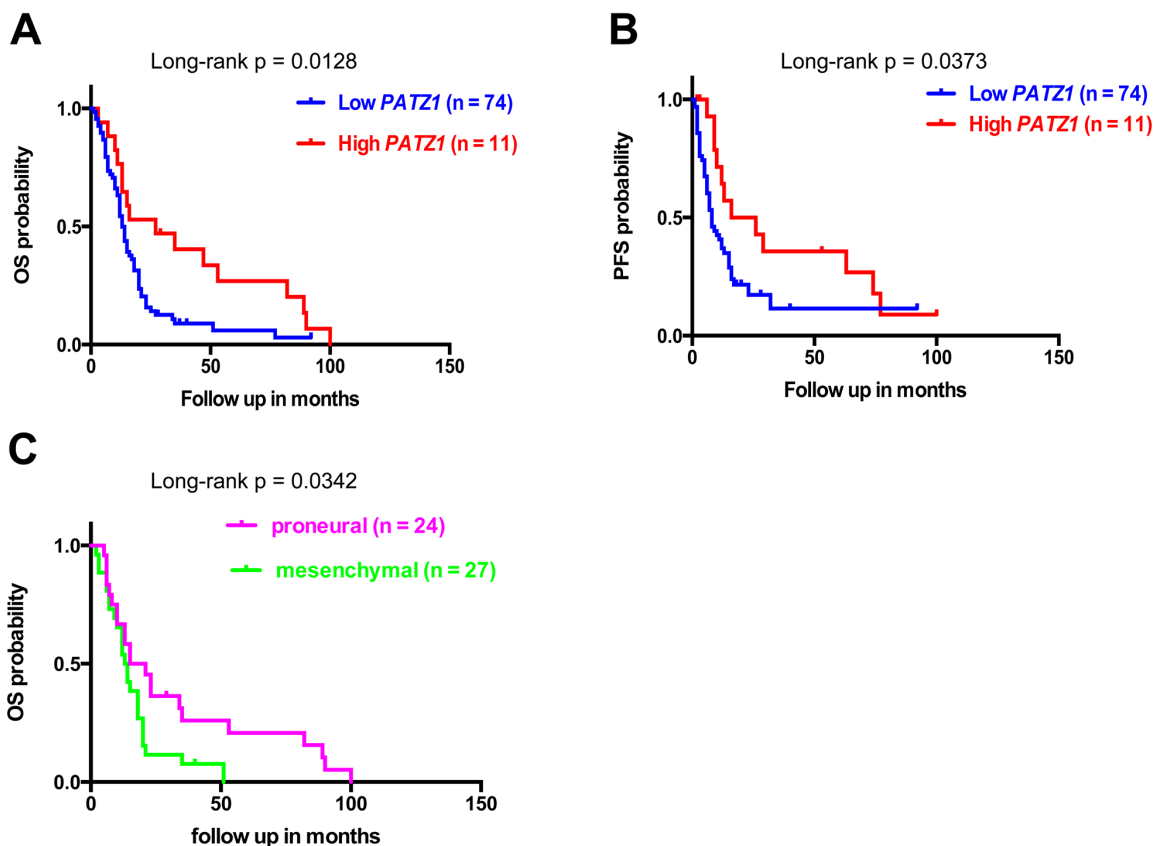

**Supplementary Figure 2:** (A) Overall (OS) and (B) progression-free (PFS) Kaplan-Meier curves of GBM patients from the TCGA data set already shown in Figure 3B, including 85 samples representative of the four GBM subtypes. Note that patients with lower PATZ1 expression have a worse survival rate than patients with higher PATZ1 as assessed by log-rank test. (C) Overall survival in proneural and mesenchymal GBM subtypes of the same data set.

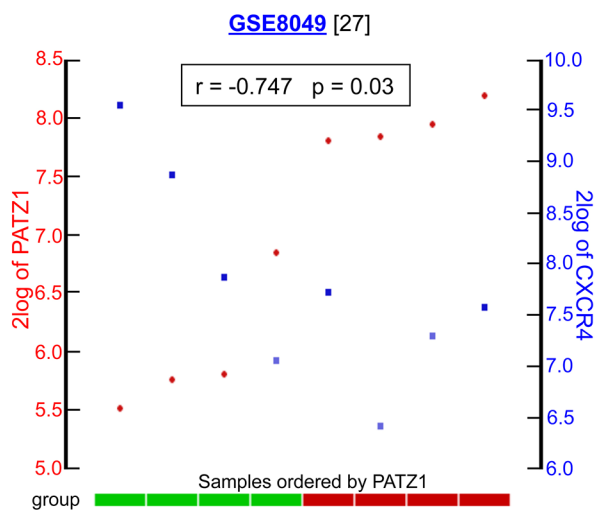

**Supplementary Figure 3:** YY-plot correlating PATZ1 and CXCR4 expression in GSCs, including 4 of the restricted Gsr phenotype (green) and 4 of the full Gsr phenotype (red). Significance of correlation (inbox) was analyzed by Pearson's  $\chi^2$  test through the R2 web platform (<http://r2.amc.nl>).

**Supplementary Table 1: Clinicopathological features and PATZ1 expression of 45 glioblastomas (local cohort analyzed by IHC)**

| Case | Gender | Age | Site | PATZ1 |
|------|--------|-----|------|-------|
| 1    | F      | 71  | f    | -     |
| 2    | F      | 62  | t    | -     |
| 3    | M      | 70  | t    | +     |
| 4    | F      | 66  | t    | ++    |
| 5    | M      | 35  | p    | ++    |
| 6    | M      | 65  | t    | -     |
| 7    | F      | 69  | t    | -     |
| 8    | F      | 41  | f    | +     |
| 9    | F      | 58  | f    | +     |
| 10   | M      | 64  | t    | +++   |
| 11   | F      | 64  | t    | ++    |
| 12   | M      | 72  | t    | +     |
| 13   | M      | 58  | f    | +     |
| 14   | M      | 74  | t    | +     |
| 15   | M      | 62  | t    | -     |
| 16   | F      | 44  | c    | -     |
| 17   | F      | 64  | p    | -     |
| 18   | M      | 62  | t    | ++    |
| 19   | M      | 60  | t    | +     |
| 20   | M      | 65  | f    | -     |
| 21   | M      | 57  | f    | +     |
| 22   | M      | 66  | p    | ++    |
| 23   | F      | 36  | t    | ++    |
| 24   | M      | 62  | o    | +     |
| 25   | M      | 62  | t    | +     |
| 26   | M      | 63  | o    | +     |
| 27   | M      | 69  | t    | +++   |
| 28   | F      | 26  | p    | ++    |
| 29   | M      | 73  | t    | -     |
| 30   | F      | 72  | t    | ++    |
| 31   | M      | 73  | p    | +++   |
| 32   | M      | 70  | p    | -     |
| 33   | M      | 52  | t    | +++   |
| 34   | M      | 41  | t    | ++    |
| 35   | M      | 63  | p    | ++    |
| 36   | M      | 60  | p    | ++    |
| 37   | M      | 61  | t    | -     |
| 38   | M      | 64  | p    | +     |
| 39   | M      | 69  | p    | +++   |
| 40   | F      | 81  | p    | +     |
| 41   | F      | 75  | f    | -     |
| 42   | M      | 54  | f    | +     |
| 43   | M      | 68  | t    | +     |
| 44   | M      | 74  | f    | +     |
| 45   | F      | 72  | t    | -     |

f, frontal; t, temporal; o, occipital; p, parietal; c, corpus callosum

**Supplementary Table 2: Clinicopathological features and PATZ1 expression of 22 oligodendrogliomas (local cohort analyzed by immunohistochemistry)**

| Case | Gender | Age | Site | Grade | PATZ1 |
|------|--------|-----|------|-------|-------|
| 1    | M      | 66  | t    | III   | +     |
| 2    | F      | 67  | f    | II    | -     |
| 3    | M      | 44  | f    | II    | -     |
| 4    | F      | 50  | t    | II    | -     |
| 5    | F      | 54  | f    | III   | -     |
| 6    | M      | 39  | f    | II    | -     |
| 7    | M      | 57  | o    | III   | +     |
| 8    | M      | 33  | f    | II    | +++   |
| 9    | M      | 26  | f    | II    | -     |
| 10   | M      | 58  | o    | III   | +     |
| 11   | M      | 31  | f    | II    | -     |
| 12   | M      | 35  | f    | II    | ++    |
| 13   | F      | 54  | t    | III   | ++    |
| 14   | M      | 69  | f    | III   | ++    |
| 15   | M      | 69  | o    | III   | ++    |
| 16   | F      | 38  | t    | III   | -     |
| 17   | M      | 41  | i    | III   | +++   |
| 18   | M      | 41  | f    | III   | +++   |
| 19   | F      | 43  | f    | II    | ++    |
| 20   | F      | 40  | f    | II    | +     |
| 21   | M      | 77  | f    | II    | -     |
| 22   | M      | 22  | f    | II    | -     |

f, frontal; t, temporal; o, occipital; p, parietal; i, intramedullary metastasis

Supplementary Table 3: Other correlations between *PATZ1* and the mesenchymal signature in GBM<sup>a</sup>

| Gene             | r <sup>b</sup> | p       | gene               | R      | P       |
|------------------|----------------|---------|--------------------|--------|---------|
| <i>THBS1</i>     | -0.317         | 3.2e-13 | <i>DAB2</i>        | -0.270 | 8.1e-10 |
| <i>COL8A2</i>    | -0.317         | 3.4e-13 | <i>TGOLN2</i>      | -0.265 | 1.9e-09 |
| <i>LTBP1</i>     | -0.314         | 5.8e-13 | <i>NRP1</i>        | -0.262 | 2.9e-09 |
| <i>HFE</i>       | -0.305         | 2.8e-12 | <i>LAPTM5</i>      | -0.262 | 2.8e-09 |
| <i>LCP1</i>      | -0.305         | 3.1e-12 | <i>NCF4</i>        | -0.253 | 9.8e-09 |
| <i>TNFRSF1A</i>  | -0.302         | 5.1e-12 | <i>COL1A2</i>      | -0.251 | 1.5e-08 |
| <i>PDPN</i>      | -0.298         | 8.8e-12 | <i>DSC2</i>        | -0.250 | 1.6e-08 |
| <i>ADAM12</i>    | -0.297         | 1.2e-11 | <b><i>CD44</i></b> | -0.242 | 4.6e-08 |
| <i>TNFRSF1B</i>  | -0.297         | 1.1e-11 | <i>EFEMP2</i>      | -0.241 | 5.6e-08 |
| <i>IL15RA</i>    | -0.294         | 1.9e-11 | <i>COL5A1</i>      | -0.241 | 5.2e-08 |
| <i>PLK3</i>      | -0.290         | 3.9e-11 | <i>WWTR1</i>       | -0.237 | 8.8e-08 |
| <i>ITGA5</i>     | -0.289         | 4.5e-11 | <i>PTRF</i>        | -0.236 | 1.0e-07 |
| <i>SLC11A1</i>   | -0.285         | 8.0e-11 | <i>MVP</i>         | -0.234 | 1.4e-07 |
| <i>TRADD</i>     | -0.280         | 1.8e-10 | <i>PTPN6</i>       | -0.231 | 2.0e-07 |
| <i>MAPK13</i>    | -0.278         | 2.4e-10 | <i>MRC2</i>        | -0.231 | 2.0e-07 |
| <i>CDCP1</i>     | -0.277         | 3.0e-10 | <i>IL4R</i>        | -0.228 | 3.0e-07 |
| <i>RAB11FIP1</i> | -0.277         | 2.8e-10 | <i>CDAP</i>        | -0.225 | 4.6e-07 |
| <i>CLCF1</i>     | -0.276         | 3.6e-10 | <i>HK3</i>         | -0.223 | 5.6e-07 |
| <i>GCNT1</i>     | -0.276         | 3.2e-10 | <i>FNDC3B</i>      | -0.212 | 2.1e-06 |
| <i>LCP2</i>      | -0.275         | 4.2e-10 | <i>DCBLD2</i>      | -0.210 | 2.6e-06 |
| <i>FOLR2</i>     | -0.274         | 4.4e-10 | <i>CNN2</i>        | -0.207 | 3.9e-06 |
| <i>TNFRSF11A</i> | -0.271         | 7.7e-10 |                    |        |         |

<sup>a</sup> All genes belong to the mesenchymal signature described by Verhaak et al. [7]

<sup>b</sup> Correlations were analyzed by Pearson's  $\chi^2$  test through the R2 platform (<http://r2.amc.nl>)

Supplementary Table 4: Oligodendrocyte precursor and proneural gene expression correlations with *PATZ1* in GBM-derived stem cells

|               | GSE8049 (Gunter et al. 2008) | GSE15209 (Pollard et al. 2009) |
|---------------|------------------------------|--------------------------------|
| <i>DLL3</i>   | r = 0.844; p = 2.1e-05       | r = 0.56; p = 1e-02            |
| <i>SOX2</i>   | r = 0.617; p = 8.4e-03       | r = 0.837; p = 4.2e-06         |
| <i>SOX8</i>   | r = 0.681; p = 2.6e-03       | r = 0.704; p = 5.3e-04         |
| <i>NES</i>    | r = 0.655; p = 4.3e-03       | r = 0.611; p = 4.2e-03         |
| <i>OLIG2</i>  | r = 0.739; p = 7.1e-04       | r = 0.556; p = 1e-02           |
| <i>OLIG1</i>  | r = 0.687; p = 2.3e-03       | r = 0.556; p = 1e-02           |
| <i>NKX2.2</i> | r = 0.566; p = 2e-02         | r = 0.494; p = 3e-03           |
| <i>DCX</i>    | r = 0.488; p = 5e-02         | r = 0.705; p = 5.2e-04         |
| <i>ASCL1</i>  | r = 0.761; p = 3.9e-04       | r = 0.778; p = 5.3e-05         |
| <i>TCF4</i>   | r = 0.577; p = 2e-02         | r = 0.582; p = 7.1e-03         |

Supplementary Table 5: Molecular and clinical features in proneural GBM (TCGA dataset)

| ID patient           | OS f/u<br>(months) | PFS f/u<br>(months) | Age | MGMT<br>methylation | <i>PATZ1</i><br>(Cutoff: 100.6) | <i>CXCR4</i><br>(Cutoff: 197.7) |
|----------------------|--------------------|---------------------|-----|---------------------|---------------------------------|---------------------------------|
| 02-0003 <sup>a</sup> | 5                  | 5                   | 50  | No                  | Low                             | High                            |
| 06-0648              | 10                 | 7                   | 77  | Yes                 | Low                             | High                            |
| 12-0618              | 13                 | 2                   | 49  | No                  | High                            | High                            |
| 06-0238              | 13                 | 10                  | 46  | No                  | High                            | High                            |
| 12-0616              | 15                 | 13                  | 36  | No                  | High                            | High                            |
| 02-0069              | 29                 | 29                  | 31  | Yes                 | High                            | Low                             |
| 02-0010              | 35                 | 12                  | 20  | No                  | High                            | Low                             |
| 02-0024              | 53                 | 53                  | 35  | No                  | High                            | Low                             |
| 02-0014              | 82                 | 74                  | 25  | No                  | High                            | Low                             |
| 02-0080              | 89                 | 77                  | 28  | No                  | High                            | Low                             |
| 02-0028              | 90                 | 63                  | 39  | Yes                 | High                            | Low                             |
| 02-0114              | 100                | 100                 | 37  | Yes                 | High                            | Low                             |
| 06-0646              | 6                  | 3                   | 60  | No                  | Low                             | High                            |
| 06-0166              | 6                  | 2                   | 51  | No                  | Low                             | High                            |
| 02-0060              | 6                  | 6                   | 66  | No                  | Low                             | High                            |
| 02-0046              | 7                  | 6                   | 61  | No                  | Low                             | High                            |
| 02-0058              | 8                  | 6                   | 28  | Yes                 | Low                             | High                            |
| 02-0074              | 10                 | 5                   | 68  | No                  | Low                             | High                            |
| 06-0241              | 15                 | 15                  | 66  | Yes                 | Low                             | Low                             |
| 02-0047              | 15                 | 2                   | 78  | No                  | Low                             | High                            |
| 02-0011              | 21                 | 5                   | 19  | No                  | Low                             | Low                             |
| 06-0128              | 23                 | 6                   | 66  | No                  | Low                             | High                            |
| 02-0007              | 23                 | 17                  | 40  | No                  | Low                             | High                            |
| 06-0129              | 34                 | 5                   | 30  | No                  | Low                             | Low                             |

<sup>a</sup> Samples highlighted in gray show opposite expression levels of *PATZ1* and *CXCR4* (75% negative concordance)
